# Supplementary material
Source: PubMed Central journal article supplement (PMC2527896)
Supplement: 0805858105_0805858105SI.pdf [file 0805858105_0805858105SI.pdf]

# Supporting Information

Alvizo and Mayo 10.1073/pnas.0805858105

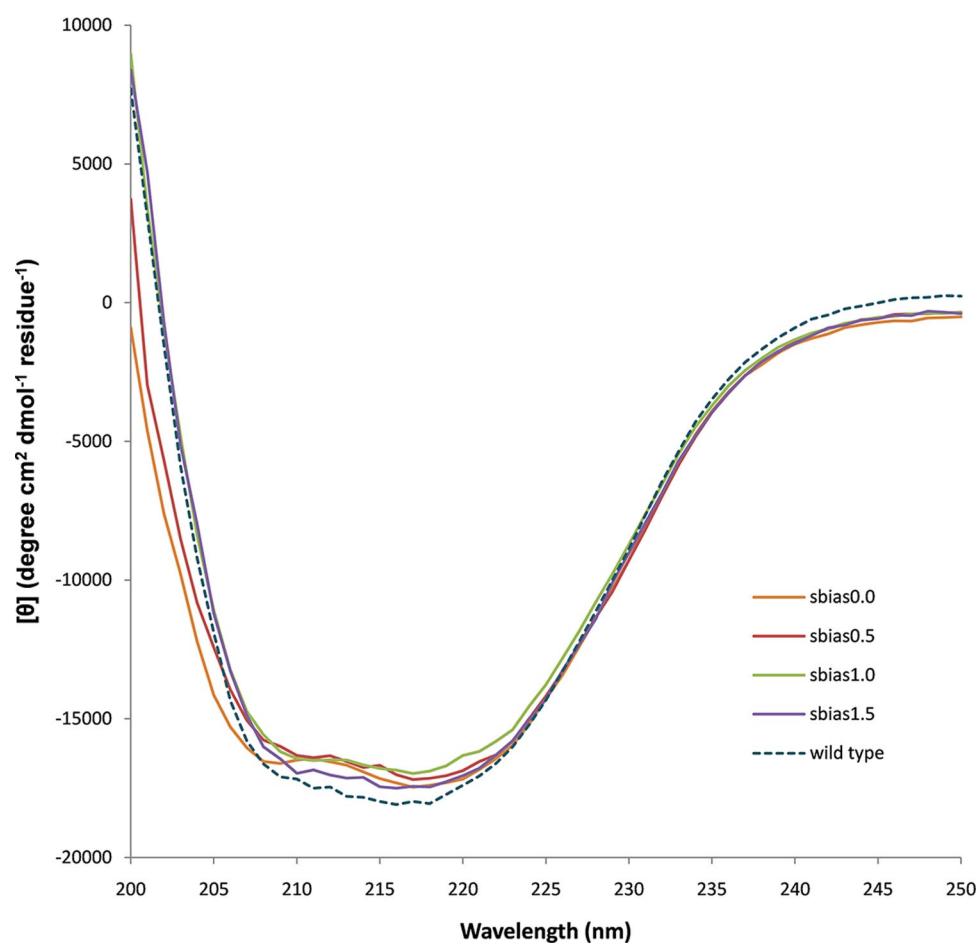

Fig. S1. Circular dichroism wavelength scans for  $G\beta 1$  and the various fixed composition proteins computed with the tuned force field.

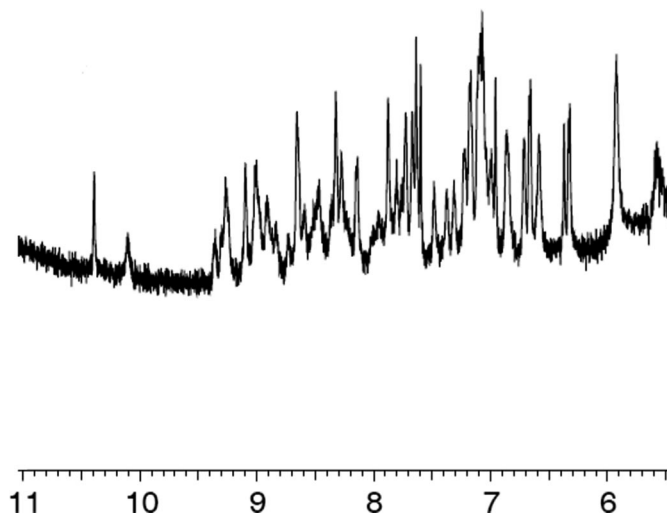

Fig. S2. The amide region of the 1D <sup>1</sup>H NMR spectrum of Gβ1's unbiased sequence design (sbias0.0) computed with the tuned force field.
